# Supplementary material
Source: PubMed Central journal article supplement (PMC4408606)
Supplement: NIHMS681815-supplement-supplement_1.pdf [file NIHMS681815-supplement-supplement_1.pdf]

## APPENDIX

SUPPLEMENTARY TABLE 1

## Algorithm for defining polycystic ovary syndrome phenotypes

| Features/ICD-9-CM codes                                  | Phenotype A (NIH or classic) <sup>a</sup>                                                                                   | Phenotype B <sup>b</sup>                                | Phenotype C <sup>c</sup>                                                             | Phenotype D <sup>d</sup>                                                                                                               |
|----------------------------------------------------------|-----------------------------------------------------------------------------------------------------------------------------|---------------------------------------------------------|--------------------------------------------------------------------------------------|----------------------------------------------------------------------------------------------------------------------------------------|
| Clinical hyperandrogenism (hirsutism, acne, OR alopecia) | Present <sup>e</sup>                                                                                                        | Present <sup>e</sup>                                    | Absent <sup>f</sup>                                                                  | Present <sup>e</sup>                                                                                                                   |
| Menstrual or ovulatory dysfunction, or both              | Present <sup>e</sup>                                                                                                        | Absent <sup>f</sup>                                     | Present <sup>e</sup>                                                                 | Present <sup>e</sup>                                                                                                                   |
| Polycystic ovaries                                       | Absent <sup>f</sup>                                                                                                         | Present <sup>e</sup>                                    | Present <sup>e</sup>                                                                 | Present <sup>e</sup>                                                                                                                   |
| ICD-9-CM codes grouping                                  | (704.1, 706.0 or 706.1, or 704.0, or 704.00) plus (626.0, 626.1, 626.2, 626.3, 626.4, 626.5, 626.6, 626.7, 626.8, or 626.9) | (704.1, 706.0 or 706.1, or 704.0, or 704.00) plus 256.4 | (626.0, 626.1, 626.2, 626.3, 626.4, 626.5, 626.6, 626.7, 626.8, or 626.9) plus 256.4 | (704.1, 706.0 or 706.1, or 704.0, or 704.00) plus (626.0, 626.1, 626.2, 626.3, 626.4, 626.5, 626.6, 626.7, 626.8, or 626.9) plus 256.4 |

ICD-9-CM, International Classification of Diseases, Ninth Revision, Clinical Modification; NIH, National Institutes of Health.

<sup>a</sup> Women with clinical hyperandrogenism and menstrual or ovulatory dysfunction, or both; <sup>b</sup> Women with hyperandrogenism and polycystic ovaries; <sup>c</sup> Women with menstrual or ovulatory dysfunction, or both, and polycystic ovaries; <sup>d</sup> Women with clinical hyperandrogenism; menstrual or ovulatory dysfunction, or both; and polycystic ovaries; <sup>e</sup> Phenotype had ICD-9 CM codes for features listed; <sup>f</sup> Phenotype did not have ICD-9-CM codes for features listed.

Okoroh. Polycystic ovary syndrome and venous thromboembolism. *Am J Obstet Gynecol* 2012.

SUPPLEMENTARY TABLE 2

## Current Procedural Terminology codes used in defining venous thromboembolism

| CPT codes                  | Description                                             |
|----------------------------|---------------------------------------------------------|
| Laboratory services        |                                                         |
| 85210                      | Clotting; prothrombin, specific                         |
| 85220                      | Clotting; factor V factor                               |
| 85302                      | Clotting inhibitors; protein C, antigen                 |
| 85378-85380                | Fiber degradation products, D-dimer                     |
| 85610                      | Prothrombin time                                        |
| Imaging and other services |                                                         |
| 75741-75746                | Angiography, pulmonary                                  |
| 78457-78458                | Venous thrombosis imaging                               |
| 78596                      | Pulmonary quantitative function study                   |
| 99363-99364                | Anticoagulant management for outpatient taking warfarin |

CPT, Current Procedural Terminology.

Okoroh. Polycystic ovary syndrome and venous thromboembolism. *Am J Obstet Gynecol* 2012.
